# Supplementary material
Source: PubMed Central journal article supplement (PMC5665166)
Supplement: NIHMS912292-supplement-Supplemental_Materials.pdf [file NIHMS912292-supplement-Supplemental_Materials.pdf]

## **Supporting Information**

### **Redox-responsive      Polysulfide-based      Biodegradable      Organosilica Nanoparticles for Delivery of Bioactive Agents**

Seyyed Pouya Hadipour Moghaddam <sup>a, b</sup>, Jiban Saikia <sup>b</sup>, Mostafa Yazdimamaghani <sup>a, b</sup>, and  
Hamidreza Ghandehari <sup>a, b, c, \*</sup>

<sup>a</sup> *Department of Pharmaceutics and Pharmaceutical Chemistry, University of Utah, Salt Lake City, UT 84112, USA*

<sup>b</sup> *Utah Center for Nanomedicine, Nano Institute of Utah, University of Utah, Salt Lake City, UT 84112, USA*

<sup>c</sup> *Department of Bioengineering, University of Utah, Salt Lake City, UT 84112, USA*

<sup>\*</sup> *Corresponding Author. Utah Center for Nanomedicine, Nano Institute of Utah, 5205 S.MBB, 36 S. Wasatch Dr, Salt Lake City, UT 84112, USA*

*Email Address: [hamid\\_ghandehari@utah.edu](mailto:hamid_ghandehari@utah.edu) (H. Ghandehari)*

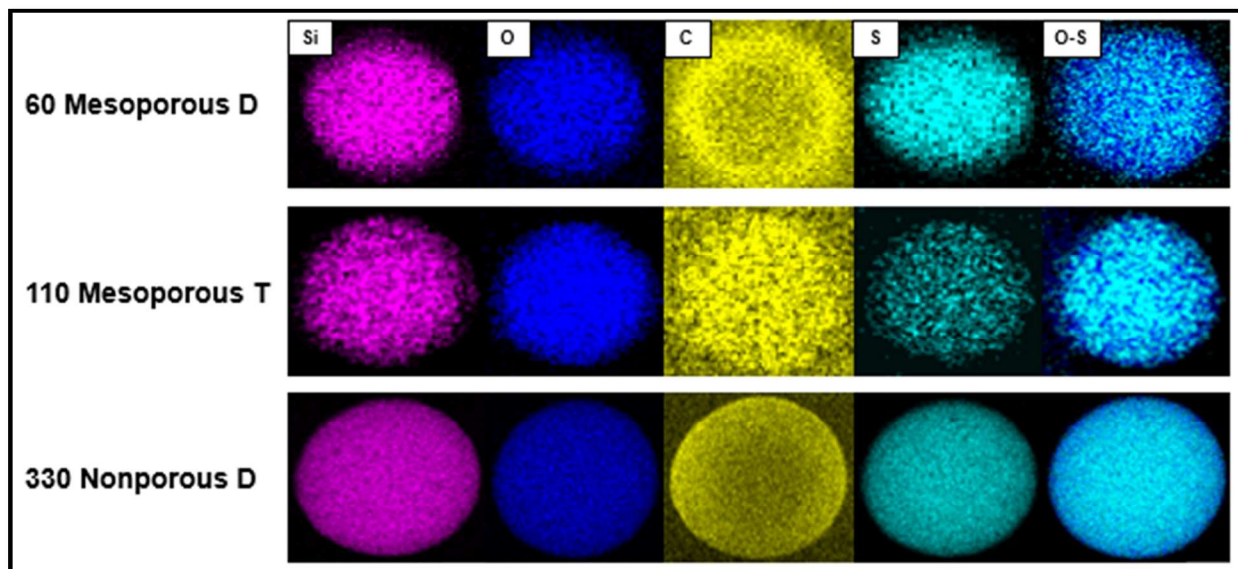

Figure S1. STEM images for 60 Mesoporous D, 110 Mesoporous T, and 330 Nonporous D nanoparticles.

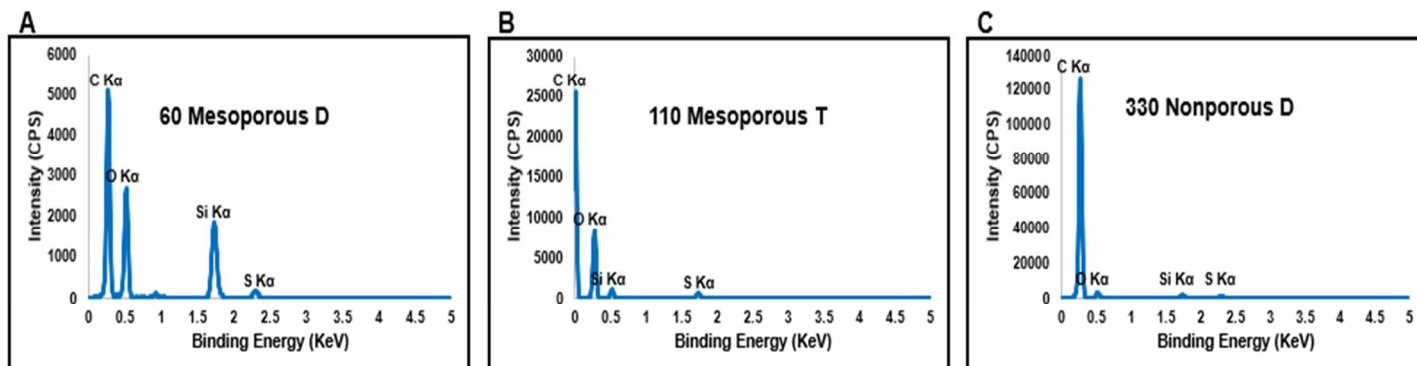

Figure S2. STEM spectra of (A) 60 Mesoporous D; (B) 110 Mesoporous T; and (C) 330 Nonporous D nanoparticles.

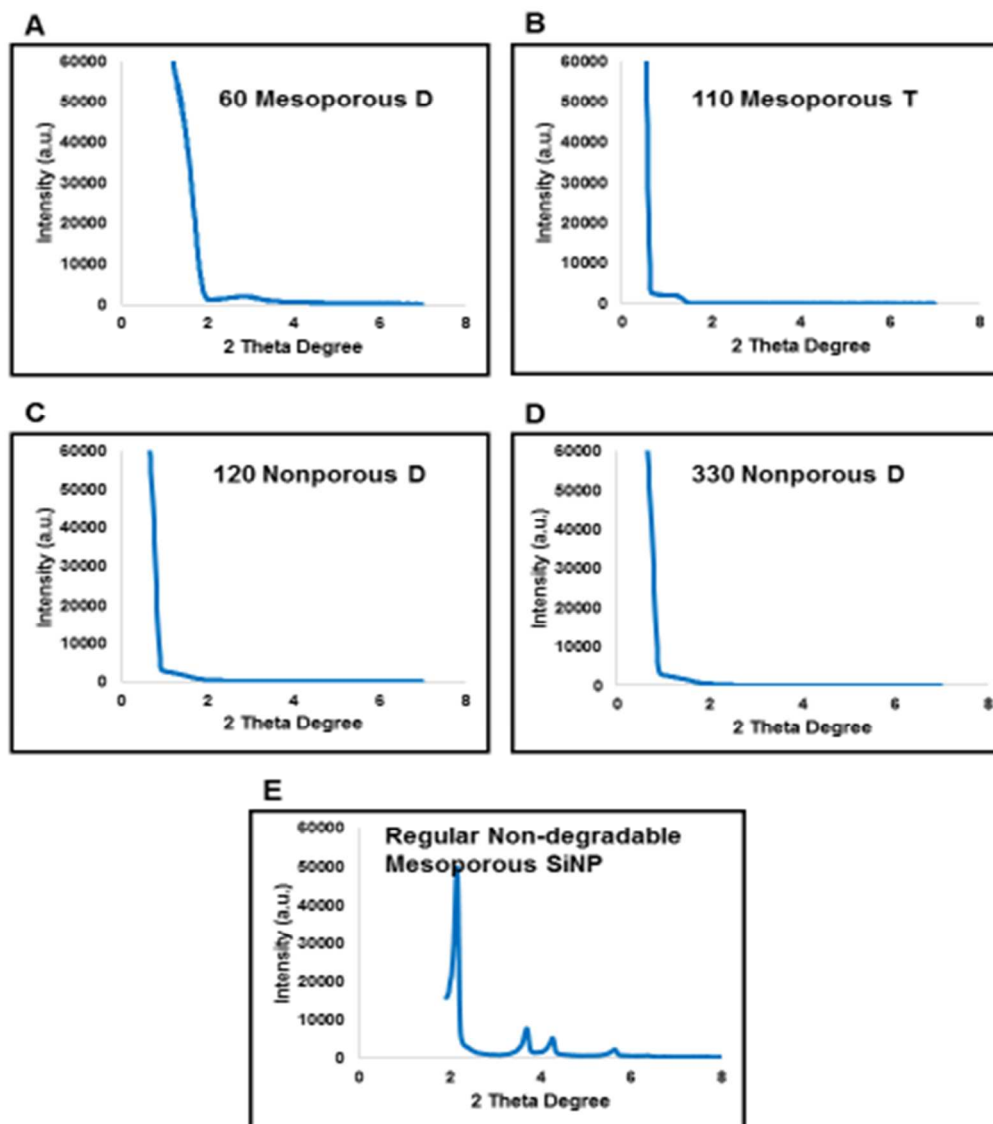

**Figure S3.** XRD graphs for (A) 60 Mesoporous D; (B) 110 Mesoporous T; (C) 120 Nonporous D; (D) 330 Nonporous D; and (E) regular non-degradable mesoporous SiNP. The degradable mesoporous nanoparticles did not exhibit the typical Bragg peaks like regular non-degradable mesoporous SiNP.

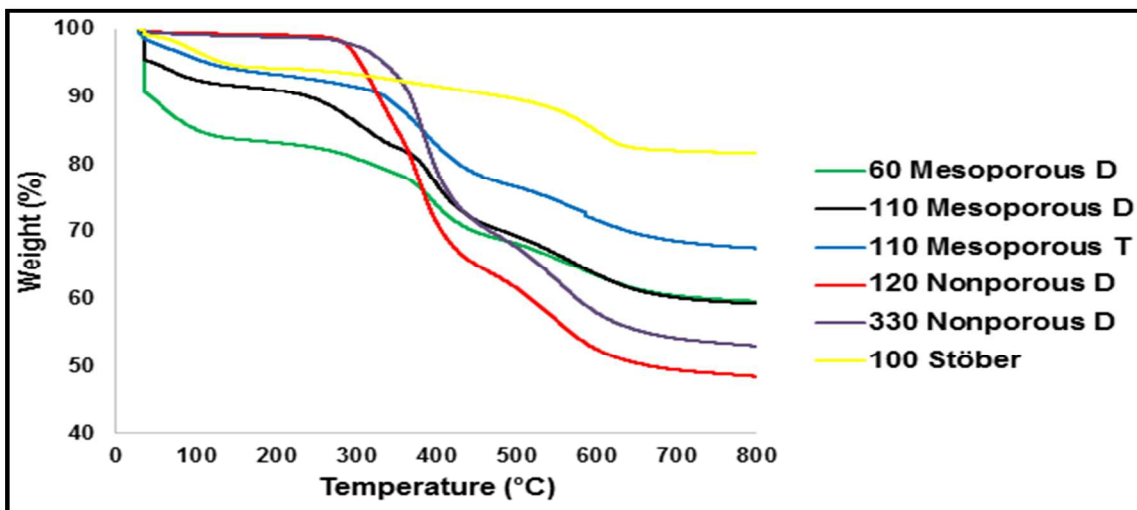

Figure S4. TGA analyses for the synthesized nanoparticles. Stöber 100 SiNP was used as a control.

**A**

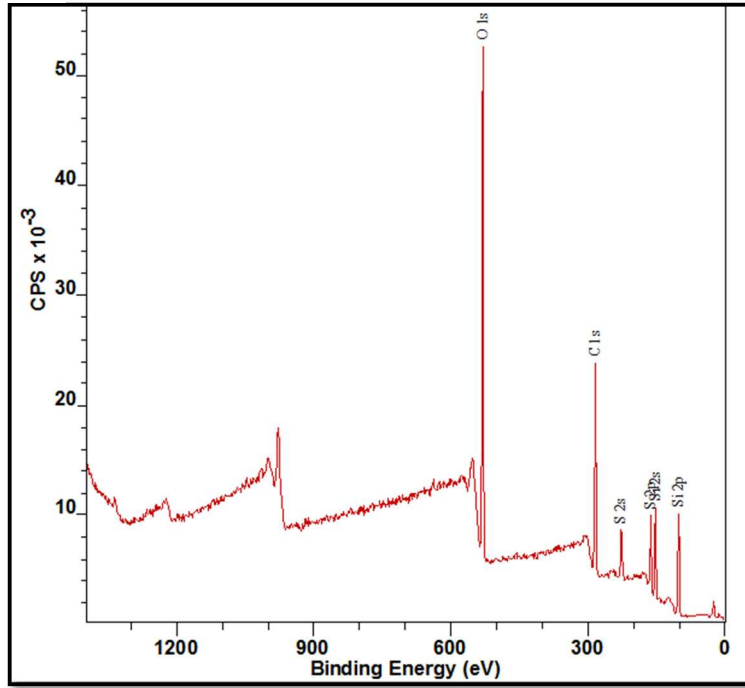

**B**

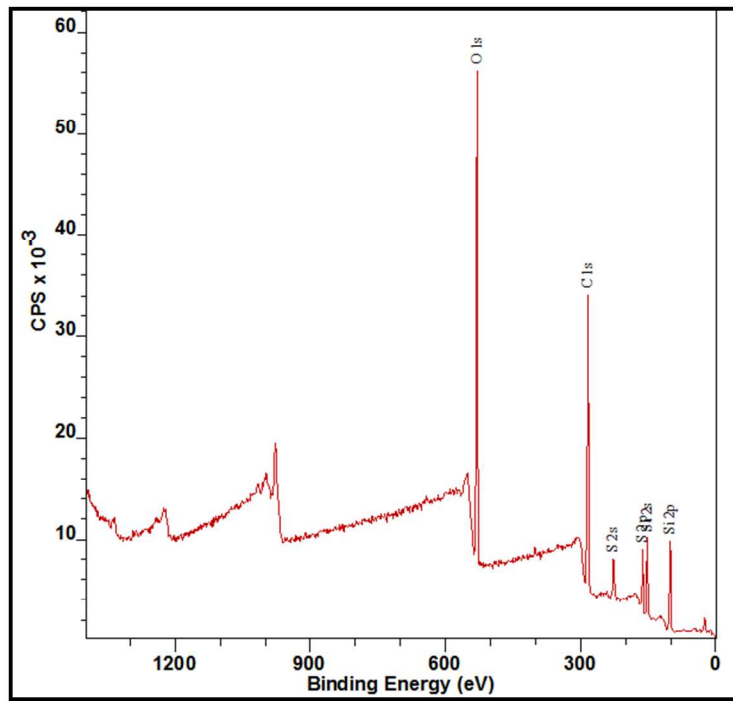

C

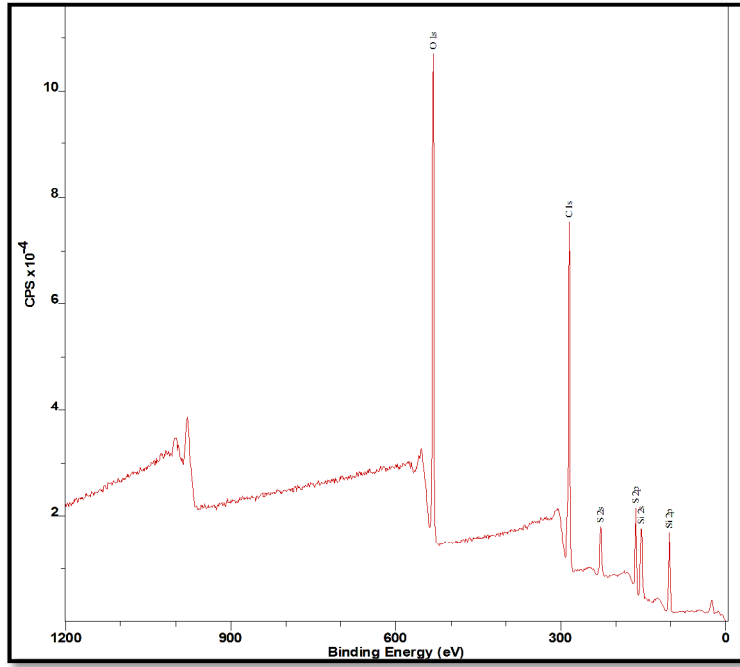

D

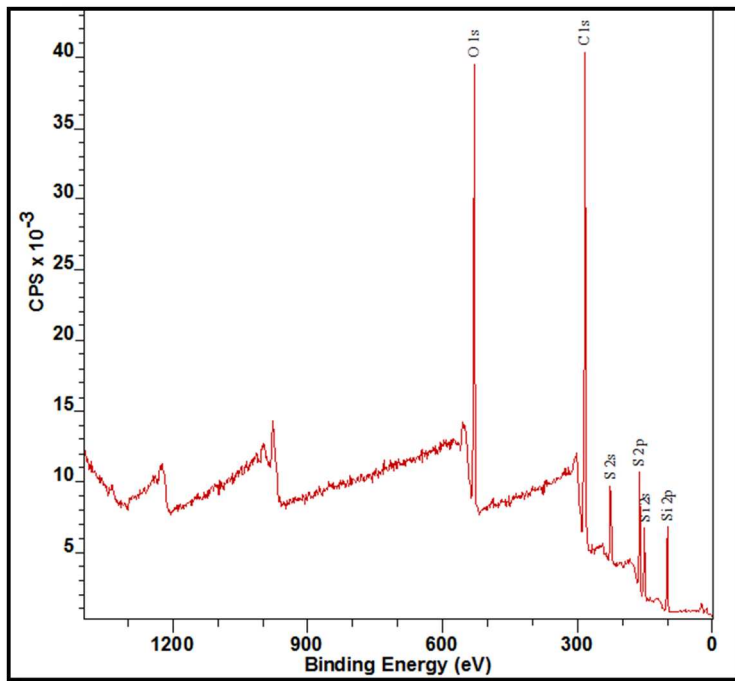

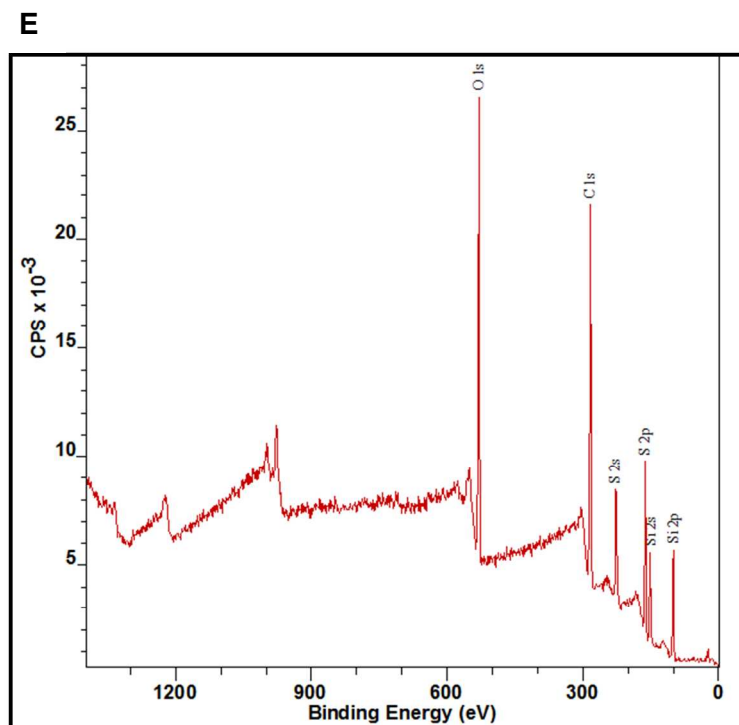

**Figure S5.** XPS survey spectra of (A) 60 Mesoporous D; (B) 110 Mesoporous D; (C) 110 Mesoporous T; (D) 120 Nonporous D; and (E) 330 Nonporous D nanoparticles.

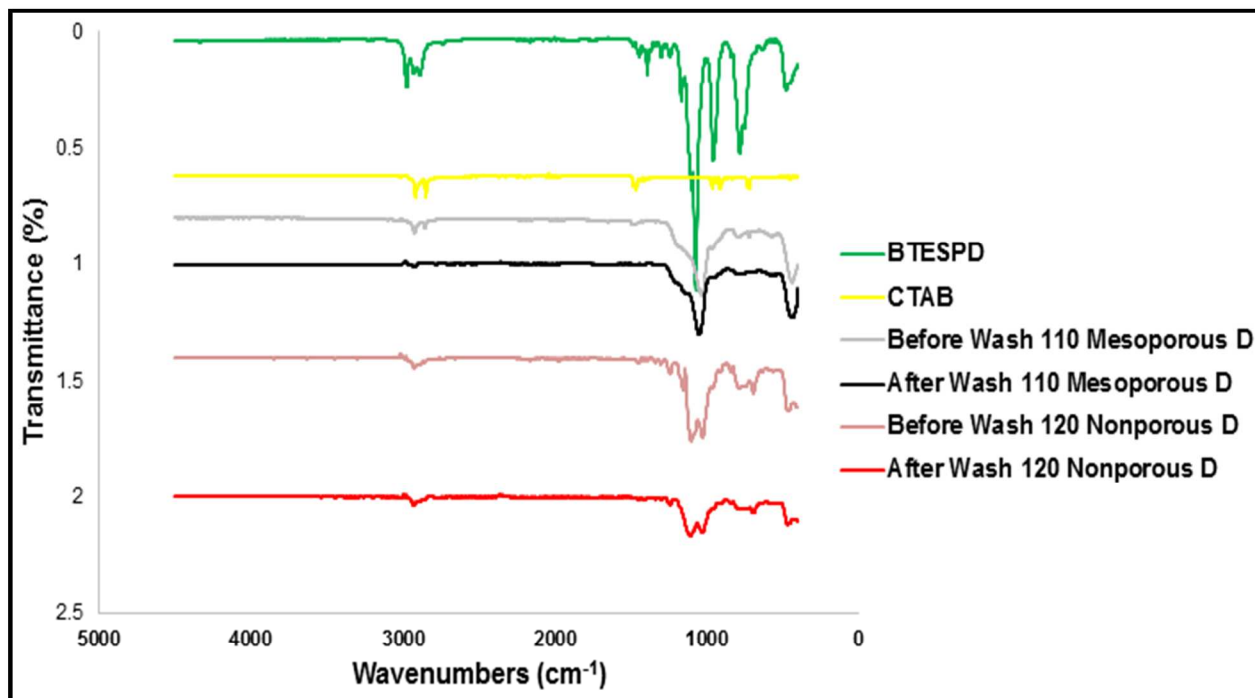

**Figure S6.** FTIR spectra of 110 Mesoporous D and 120 Nonporous D nanoparticles before and after washing. CTAB and BTESPD (disulfide-based precursor) were also analyzed for better comparison. Typical CTAB peaks around 3000 cm<sup>-1</sup> were not seen after washing the nanoparticles. This confirms complete removal of the surfactant from the pores.



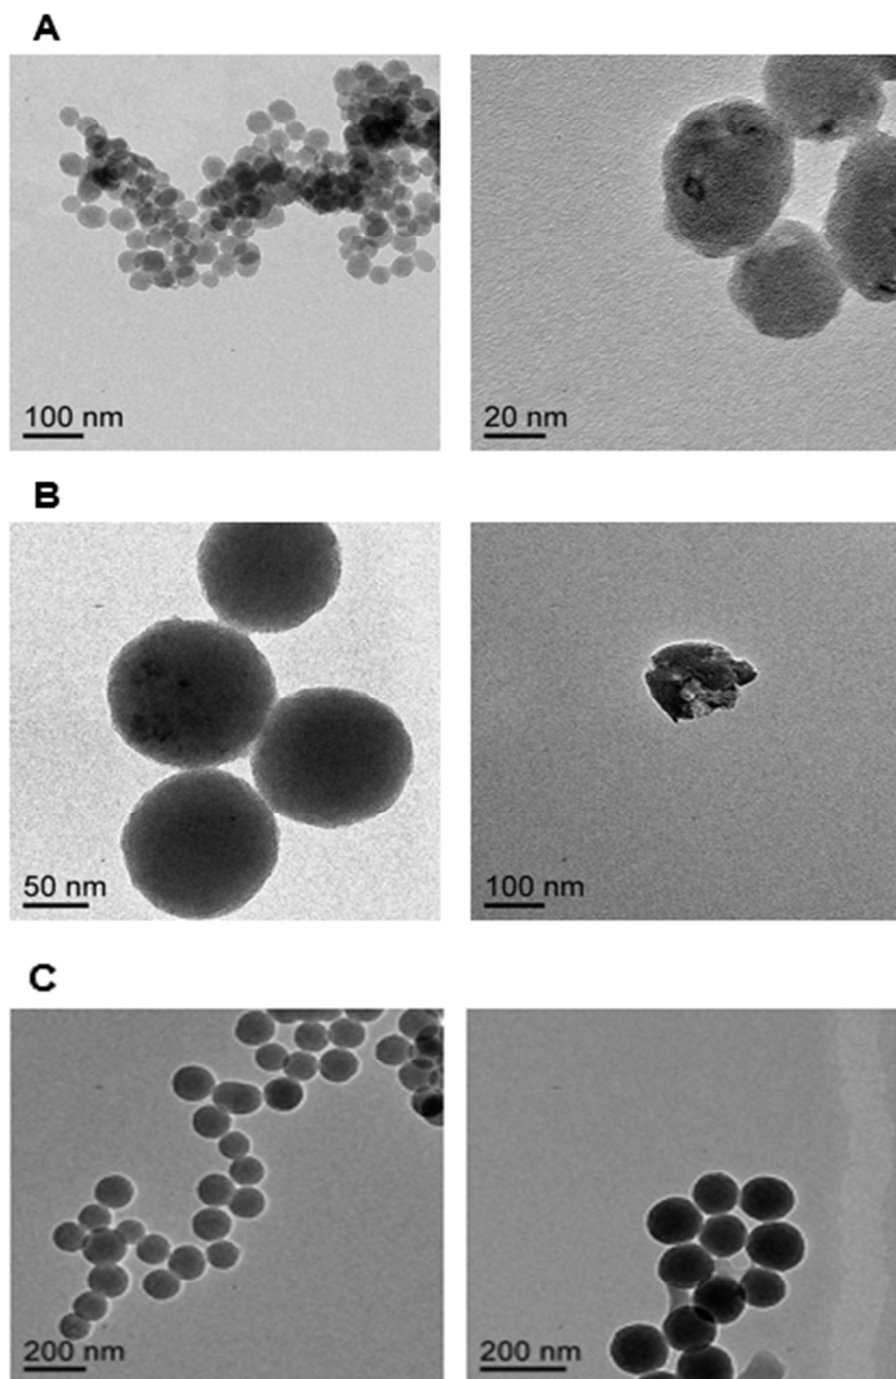

**Figure S7.** Degradation images of mesoporous nanoparticles after 15 days in the presence of 8  $\mu$ M GSH; (A) 60 Mesoporous D; (B) 110 Mesoporous D; and (C) 110 Mesoporous T nanoparticles.

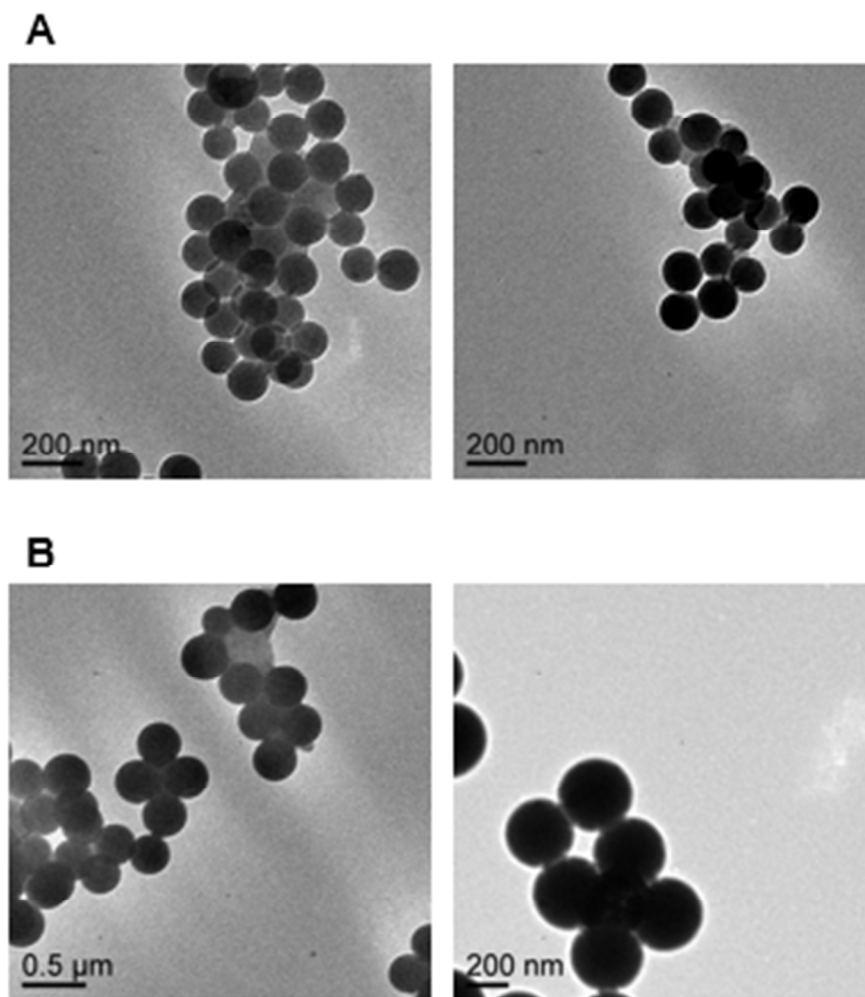

**Figure S8.** Degradation images of nonporous nanoparticles after 15 days in the presence of 8  $\mu\text{M}$  GSH; (A) 120 Nonporous D and (B) 330 Nonporous D nanoparticles.

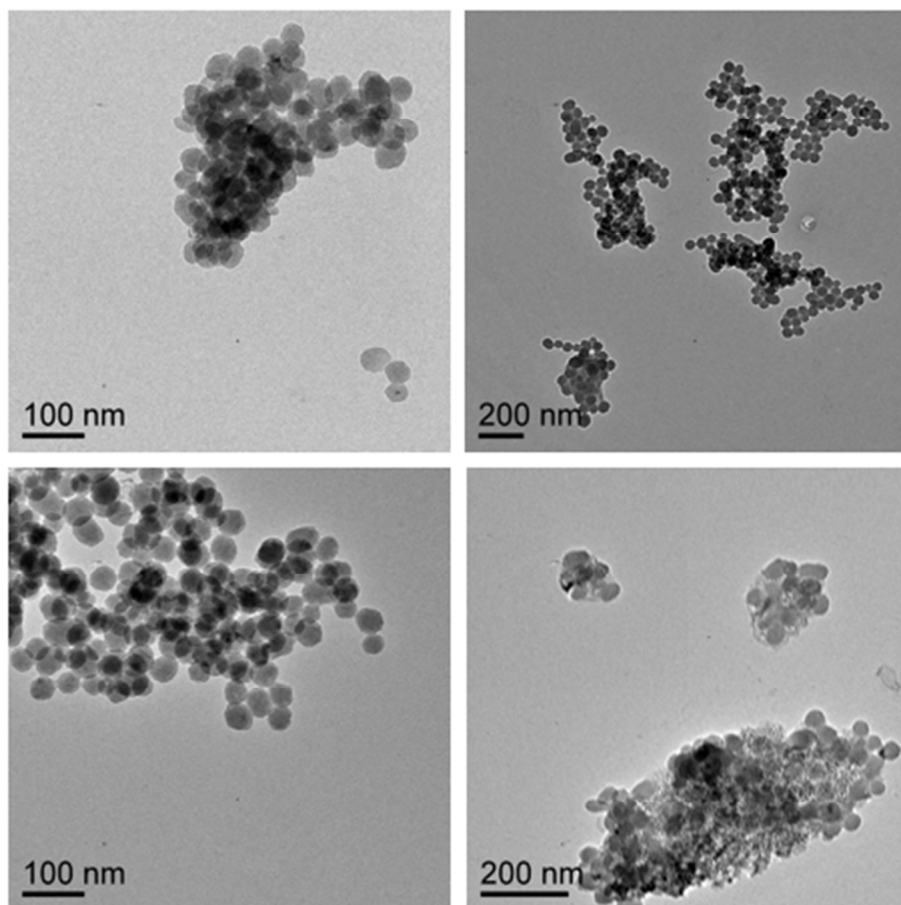

**Figure S9.** Agglomeration of 60 Mesoporous D nanoparticles in solution containing 8 mM GSH.

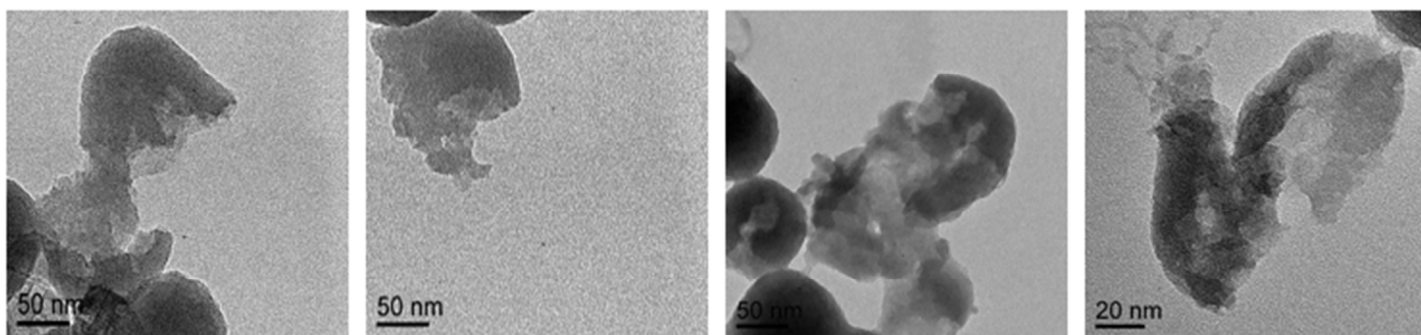

**Figure S10.** Degradation of 110 Mesoporous D nanoparticles after 48 h in the presence of 8 mM GSH.

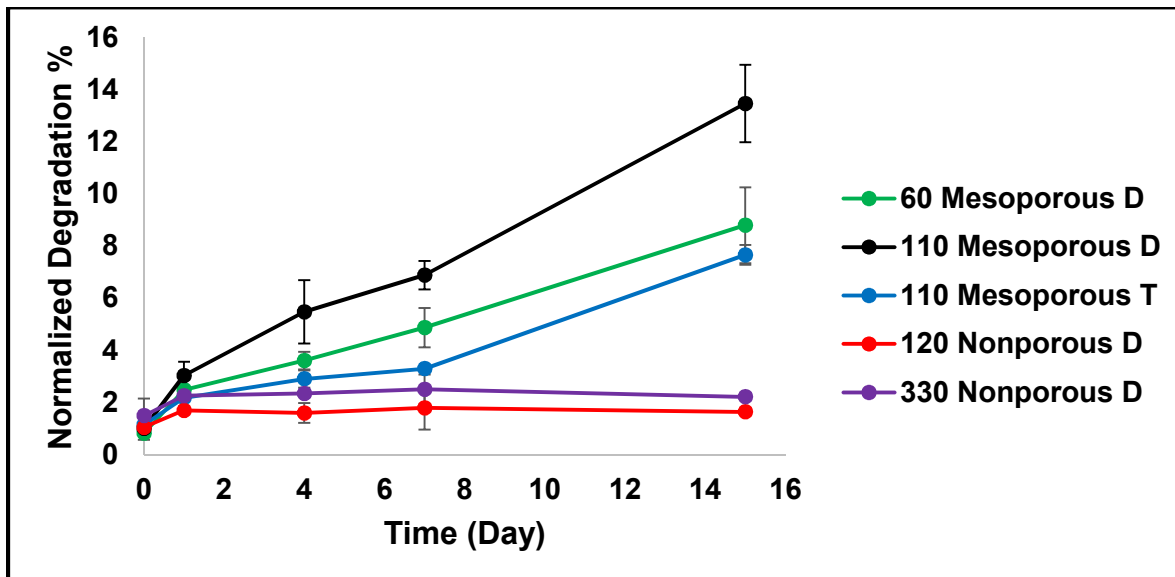

Figure S11. Normalized degradation percentages of all synthesized nanoparticles over the 15-day period of study.

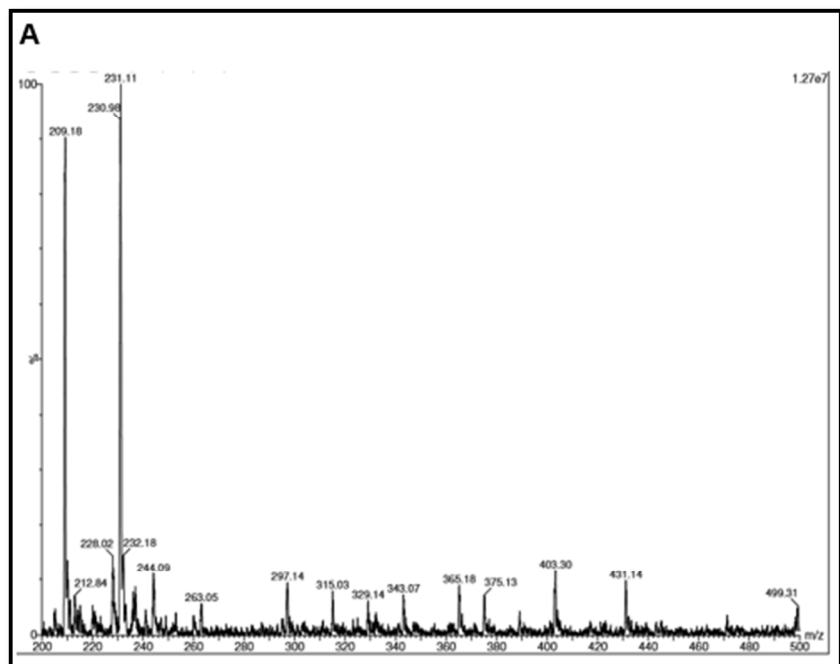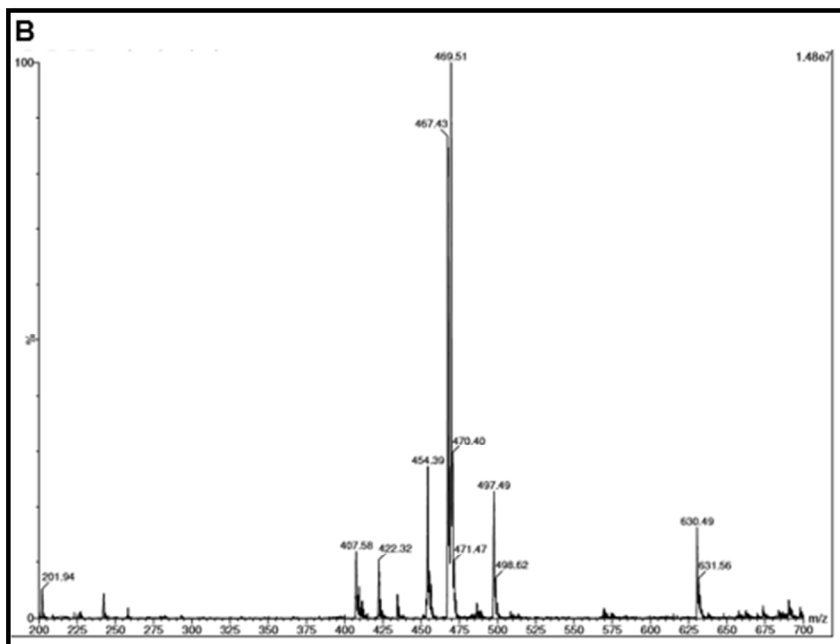

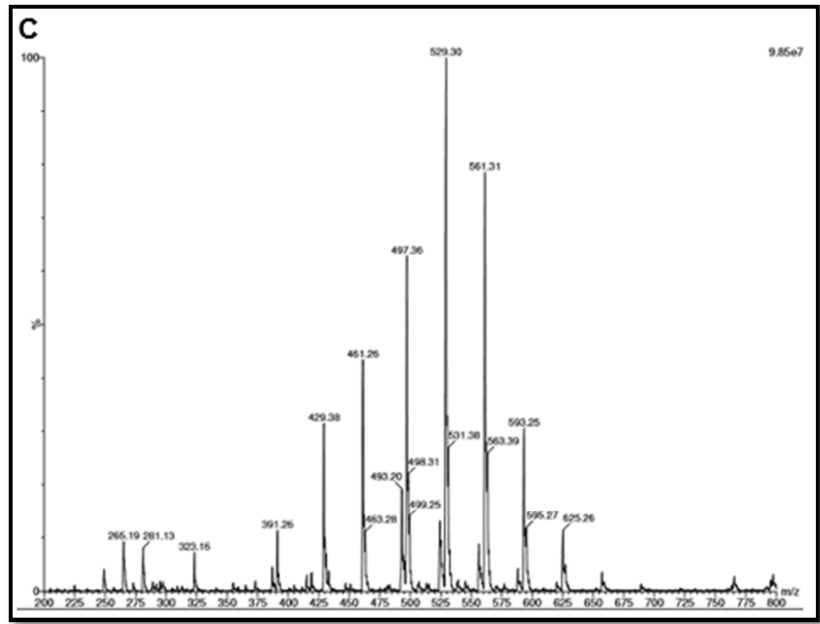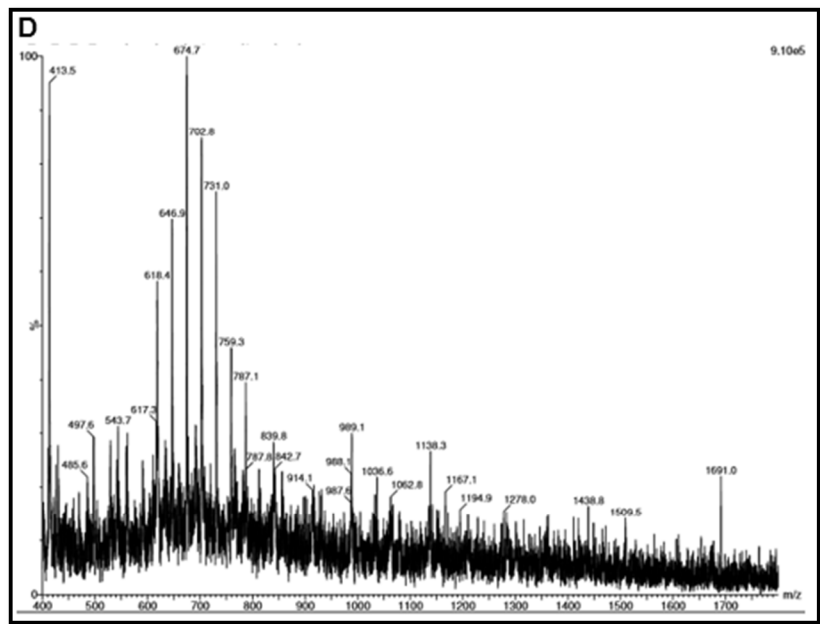

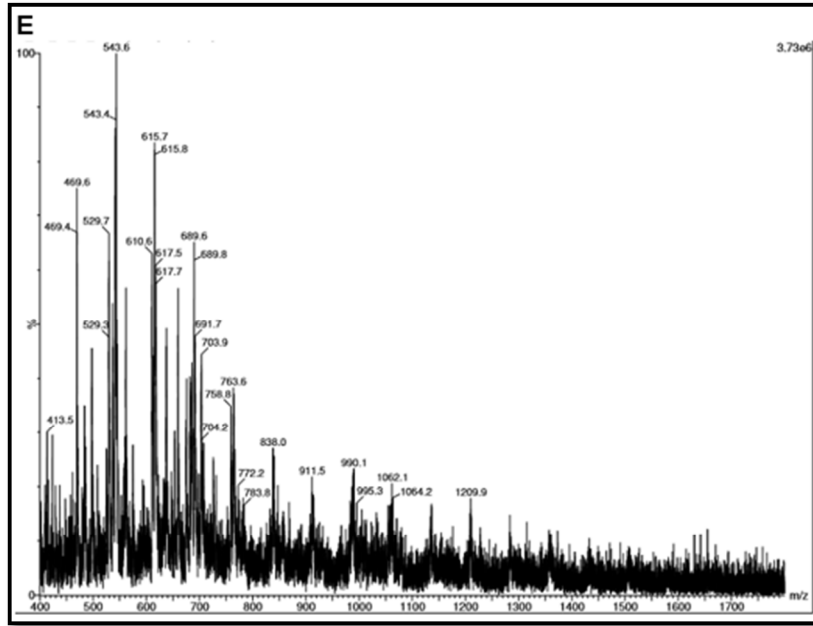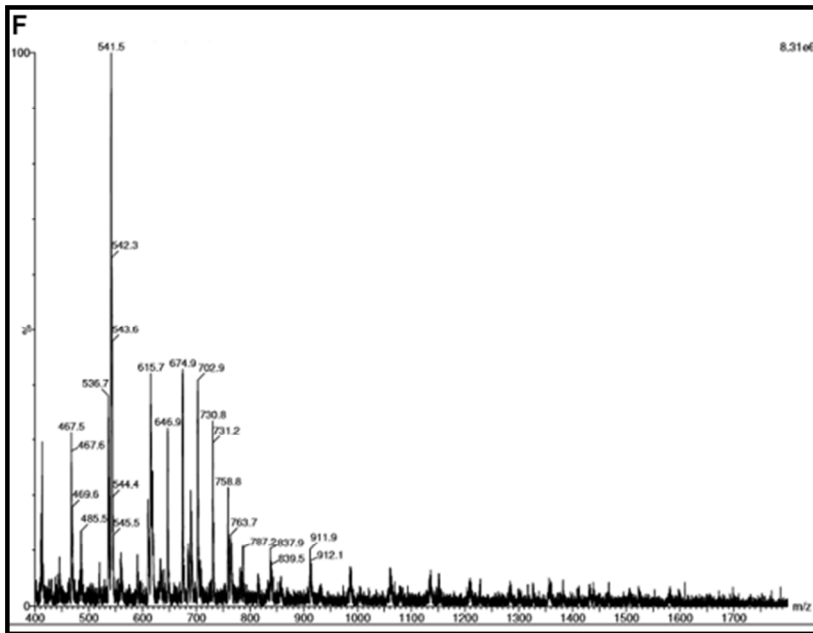

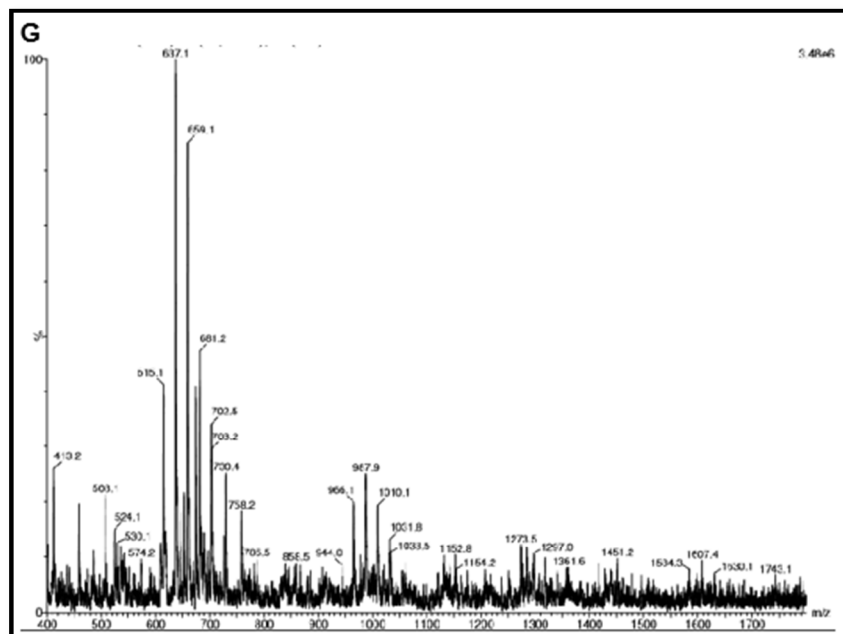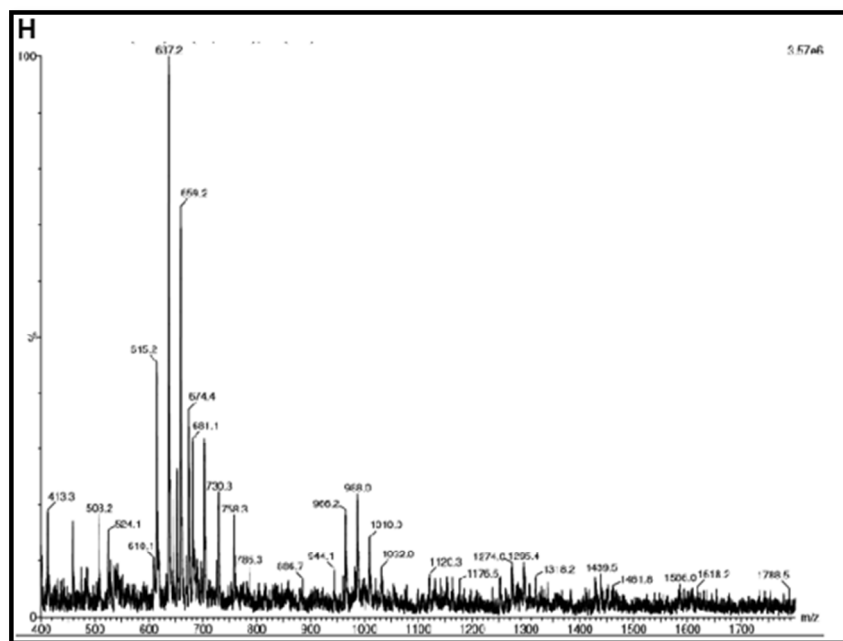

**Figure S12.** ESI-MS for 3 precursors: (A) TEOS; (B) BTESPD; and (C) BTESPT. ESI-MS for the degradation products: (D) 60 Mesoporous D; (E) 110 Mesoporous D; (F) 110 Mesoporous T; (G) 120 Nonporous D; and (H) 330 Nonporous D nanoparticles.



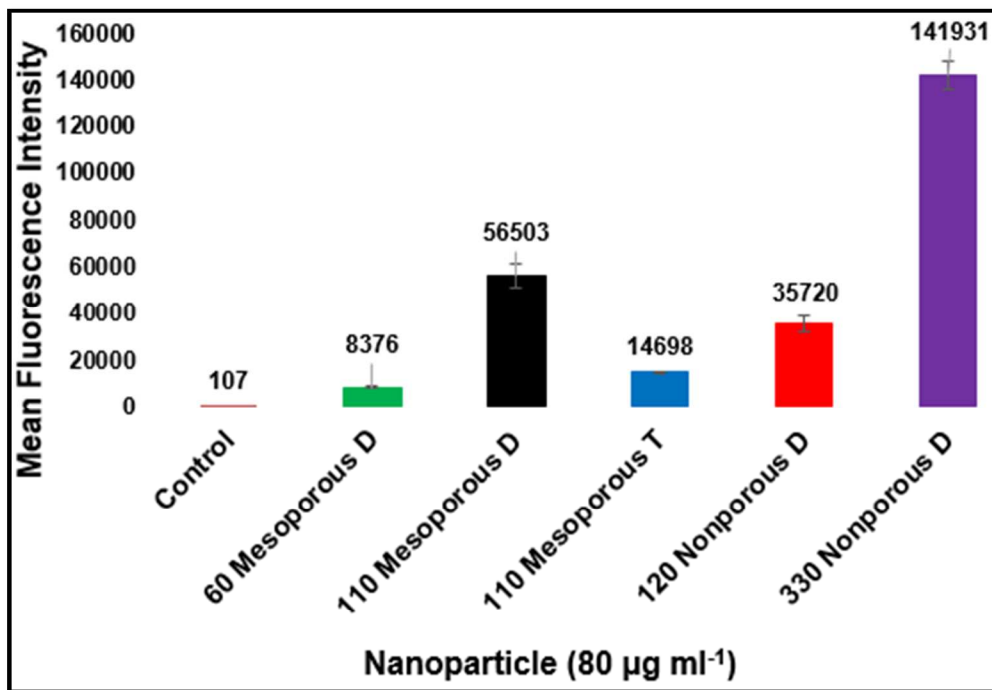

**Figure S13.** Nanoparticle uptake comparison *via* flow cytometry in RAW 264.7 macrophages after 24 h incubation with the concentration of 80 µg ml<sup>-1</sup>. Data are mean ± SD (n = 3).

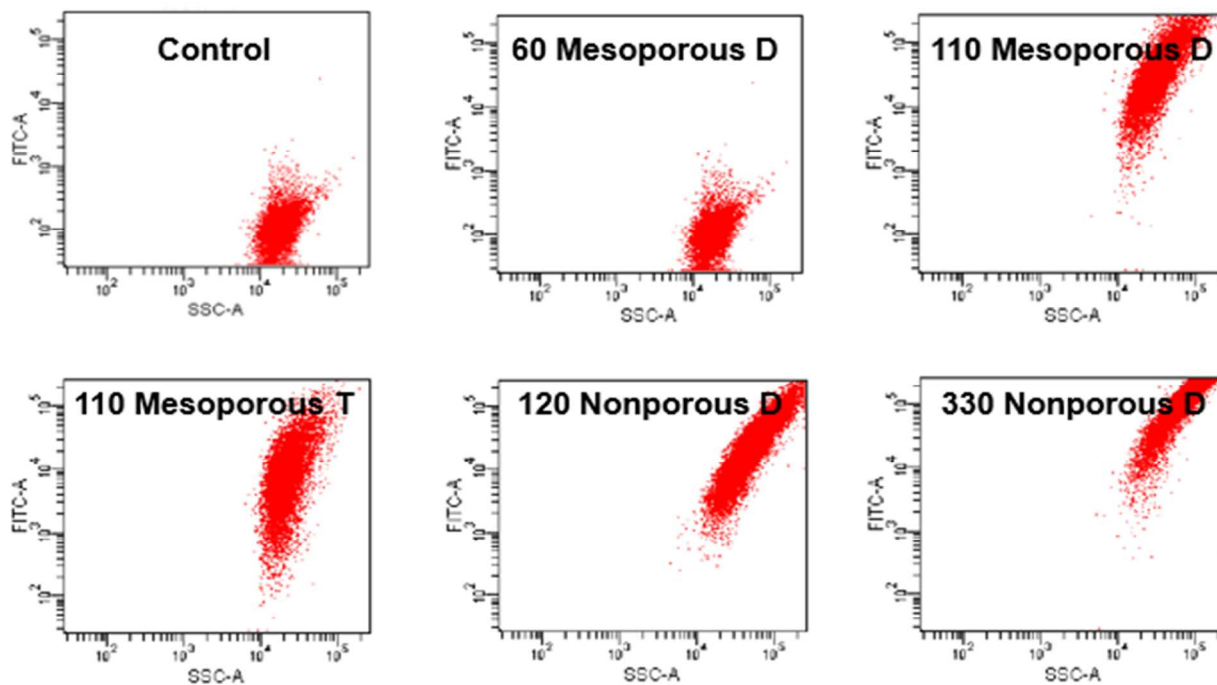

**Figure S14.** Dot plots from flow cytometry analyses of RAW 264.7 macrophages after 24 h incubation with 80 µg ml<sup>-1</sup> nanoparticles.

**Table S1.** Atomic (top) and mass (bottom) percentages of the synthesized nanoparticles measured by XPS

| <b>Nanoparticle</b>     | <b>O</b> | <b>C</b> | <b>S</b> | <b>Si</b> |
|-------------------------|----------|----------|----------|-----------|
| <b>60 Mesoporous D</b>  | 30.69    | 44.67    | 6.72     | 17.92     |
| <b>110 Mesoporous D</b> | 26.91    | 54.88    | 4.68     | 13.53     |
| <b>110 Mesoporous T</b> | 24.6     | 62       | 2.20     | 11.20     |
| <b>120 Nonporous D</b>  | 19.07    | 56.73    | 11.39    | 12.81     |
| <b>330 Nonporous D</b>  | 17.66    | 67.12    | 6.73     | 8.49      |
| <b>100 Stöber</b>       | 31.01    | 56.14    | 0        | 12.84     |

| <b>Nanoparticle</b>     | <b>O</b> | <b>C</b> | <b>S</b> | <b>Si</b> |
|-------------------------|----------|----------|----------|-----------|
| <b>60 Mesoporous D</b>  | 28.11    | 30.72    | 12.37    | 28.80     |
| <b>110 Mesoporous D</b> | 26.58    | 40.70    | 9.26     | 23.47     |
| <b>110 Mesoporous T</b> | 25.86    | 48.89    | 4.62     | 20.60     |
| <b>120 Nonporous D</b>  | 17.82    | 39.81    | 21.34    | 21.03     |
| <b>330 Nonporous D</b>  | 18.31    | 52.26    | 13.98    | 15.45     |
| <b>100 Stöber</b>       | 32.40    | 44.04    | 0        | 23.56     |
